# Supplementary material
Source: publisher site journal article supplement (https://www.dovepress.com/article/357867)
Supplement: Supplementary file 1 [file get_supplementary_file.php]

**Supplementary Table 1. Newcastle-Ottawa Scale for quality assessment**

| <b>Study</b>        | <b>Selection</b> | <b>Comparability</b> | <b>Exposure/Outcome</b> | <b>Total Score</b> |
|---------------------|------------------|----------------------|-------------------------|--------------------|
| Xu et al.           | 4                | 1                    | 3                       | 8                  |
| Guan et al. (2020)  | 4                | 2                    | 3                       | 9                  |
| Guan WJ et al.      | 4                | 2                    | 3                       | 9                  |
| Huang et al. (2020) | 4                | 2                    | 3                       | 9                  |
| Guo et al.          | 4                | 2                    | 2                       | 8                  |
| Zhou et al.         | 3                | 2                    | 2                       | 7                  |
| Zhang et al. (2020) | 4                | 2                    | 3                       | 9                  |
| Liu et al.          | 4                | 2                    | 3                       | 8                  |
| Wang et al. (2020)  | 4                | 2                    | 3                       | 8                  |
| Chen TL et al.      | 4                | 2                    | 3                       | 8                  |
| Liu J et al. (2020) | 3                | 1                    | 2                       | 7                  |
| Chen et al.         | 3                | 1                    | 2                       | 9                  |
| Yang et al.         | 3                | 2                    | 2                       | 9                  |
| Wu C et al.         | 4                | 2                    | 3                       | 9                  |
| Jie Li et al.       | 4                | 2                    | 3                       | 9                  |
| Mo et al.           | 4                | 2                    | 3                       | 8                  |
| Rong-Hui et al.     | 4                | 1                    | 3                       | 7                  |
| Chen et al.         | 4                | 2                    | 3                       | 8                  |
| Deng et al.         | 4                | 2                    | 3                       | 8                  |
| Wang et al.         | 4                | 2                    | 3                       | 9                  |
